# Supplementary material
Source: PubMed Central journal article supplement (PMC3538307)
Supplement: mt2012186x9.pdf [file mt2012186x9.pdf]

**Table S1: Primer sequences**

| <b>Primer</b> | <b>Sequence</b>                                                                         |
|---------------|-----------------------------------------------------------------------------------------|
| A1-for        | 5'- GGAAGGACCGGTATGGACCTGGGTAAGAAACTG-3'                                                |
| A1-rev        | 5'-CCCGGCCCTGTACAGATTAAGCTTTTGCAGGATTTC-3'                                              |
| A2-for        | 5'-GGAAGGACCGGTATGGAACAAAACTTATTTCTGAAGAAGATCTGATCGAGGGAAGGGACCTGGGTAAGAAACTGCTG-3'     |
| A2-rev        | 5'-CCCGGCCCTGTACAGATTAAGCTTTTGCAGGATTTC-3'                                              |
| L1-for        | 5' TTATTGACTAGTTATTAATAGTAATCAATTACGGGGTCATTAGTTCATAGCCCATATATAATGAAAGACCCCACCTGTAGG-3' |
| L1-rev        | 5'-GCCTCGAGCGGCCGCTTTACACGGCGATCTTGC-3'                                                 |
| S1-for        | 5'-TTATTGACTAGTTATTAATAGTAATCAATTACGGGGTCATTAGTTCATAGCCCATATATAATGAAAGACCCCACCTGTAGG-3' |
| S1-rev        | 5'-AATGTCCGCGGTACCCAGCCCCGGGCGACTCAGTCAATC-3'                                           |
| H1-for        | 5'-AAGCTGGGTACCGCGGGCCCGGGATCCACCGGTCGCCACCATGGCTTCGTACCCCTGCCATC-3'                    |
| H1-rev        | 5'-GCCTCGAGCGGCCGCTTCAGTTAGCCTCCCCATCTC-3'                                              |
| GFP-for       | 5'-GCTACCCCGACCACATGAAG-3'                                                              |
| GFP-rev       | 5'-GTCCATGCCGAGAGTGATCC-3'                                                              |
| luc-for       | 5'-TTCGGCTGGCAGAAGCTATG-3'                                                              |
| luc-rev       | 5'-GCTCGCGCTCGTTGTAGATG-3'                                                              |
| HSV-TK-for    | 5'-GCAGCAAGAAGCCACGGAAG-3'                                                              |
| HSV-TK-rev    | 5'-CCAGCAGTTGCGTGGTGGTG-3'                                                              |
| hTLR2-for     | 5'-AGCACACGAATACACAG-3'                                                                 |
| hTLR2-rev     | 5'-GTTATTGCCACCAGCT-3'                                                                  |
