# Supplementary material
Source: PubMed Central journal article supplement (PMC3538307)

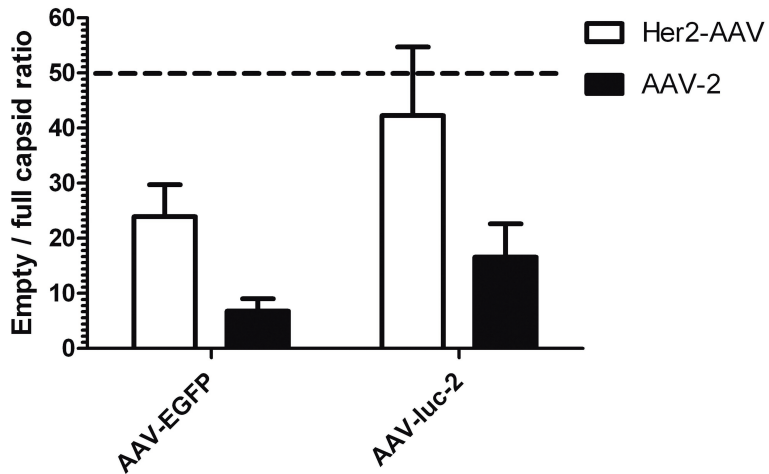

**Figure S1**

Supplement: mt2012186x1.pdf [file mt2012186x1.pdf]

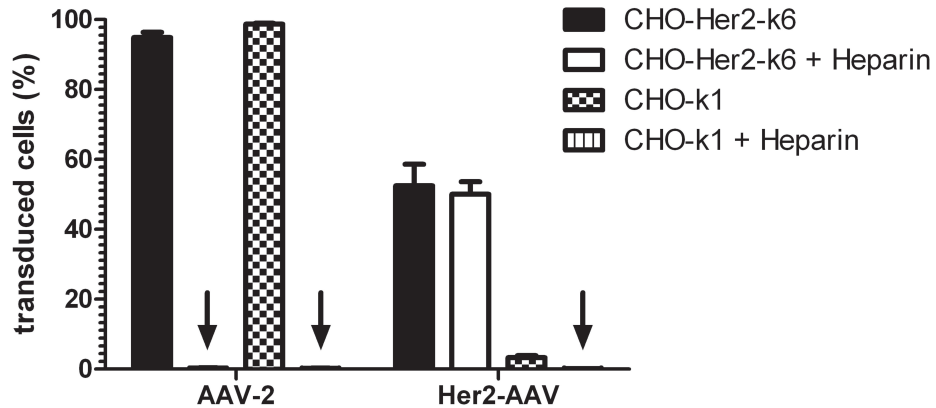

**Figure S2**

Supplement: mt2012186x2.pdf [file mt2012186x2.pdf]

**a**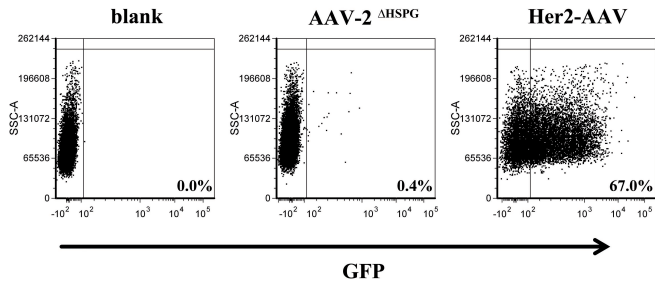**b**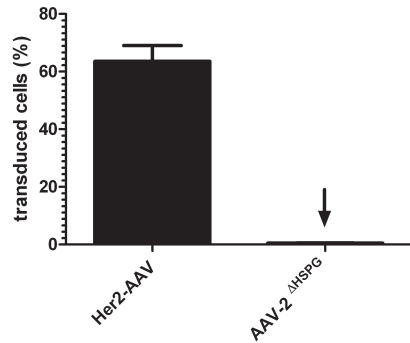**Figure S3**

Supplement: mt2012186x3.pdf [file mt2012186x3.pdf]

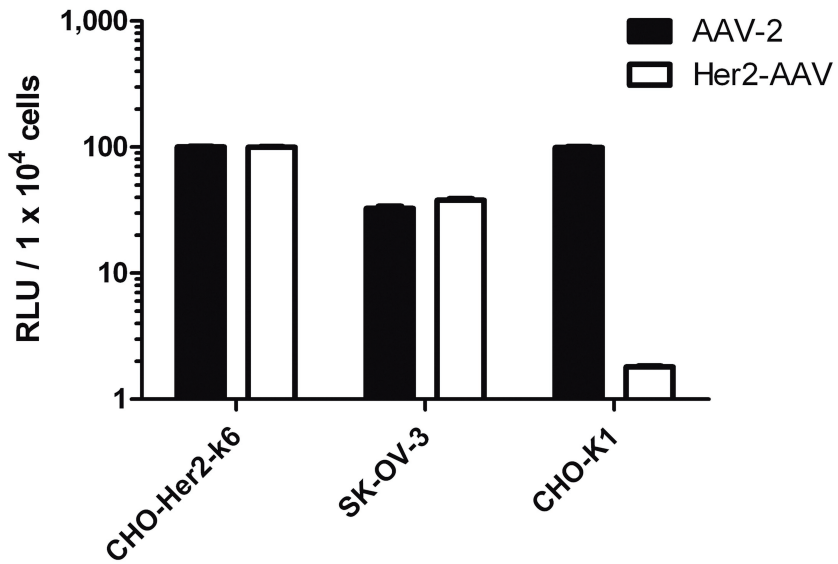

**Figure S4**

Supplement: mt2012186x4.pdf [file mt2012186x4.pdf]

**a**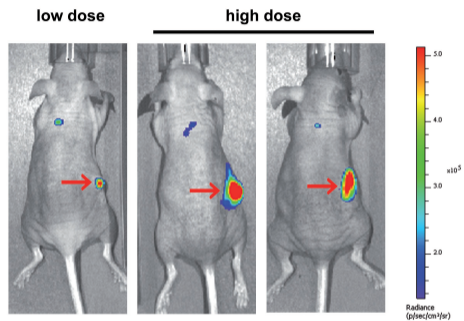**b**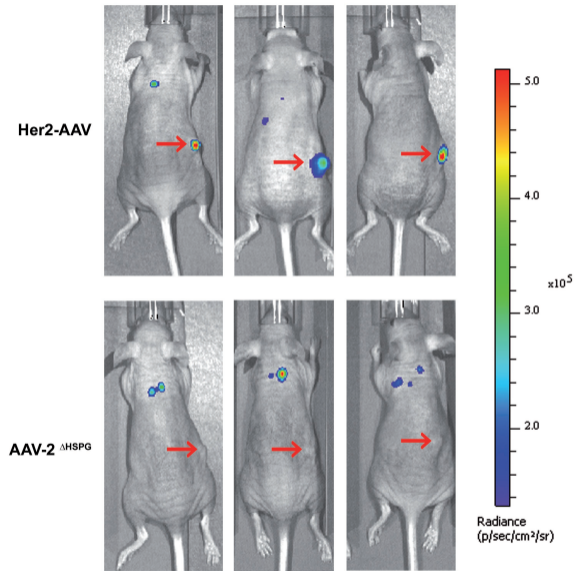**Figure S5**

Supplement: mt2012186x5.pdf [file mt2012186x5.pdf]

**a**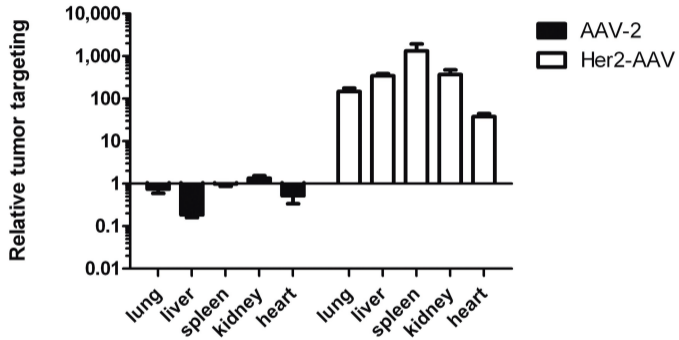**b**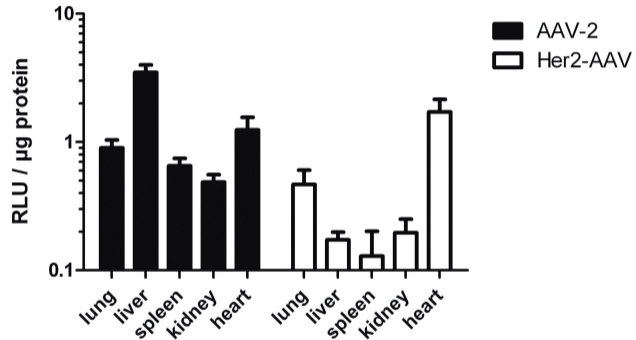

Figure S6

Supplement: mt2012186x6.pdf [file mt2012186x6.pdf]

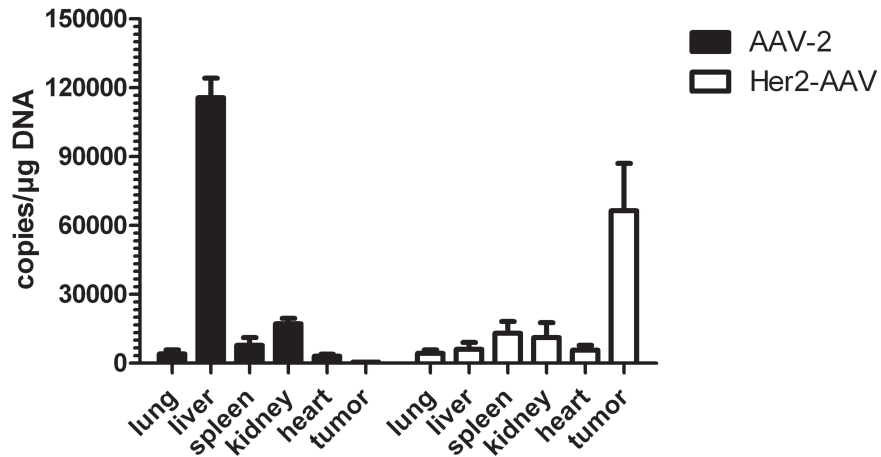

**Figure S7**

Supplement: mt2012186x7.pdf [file mt2012186x7.pdf]

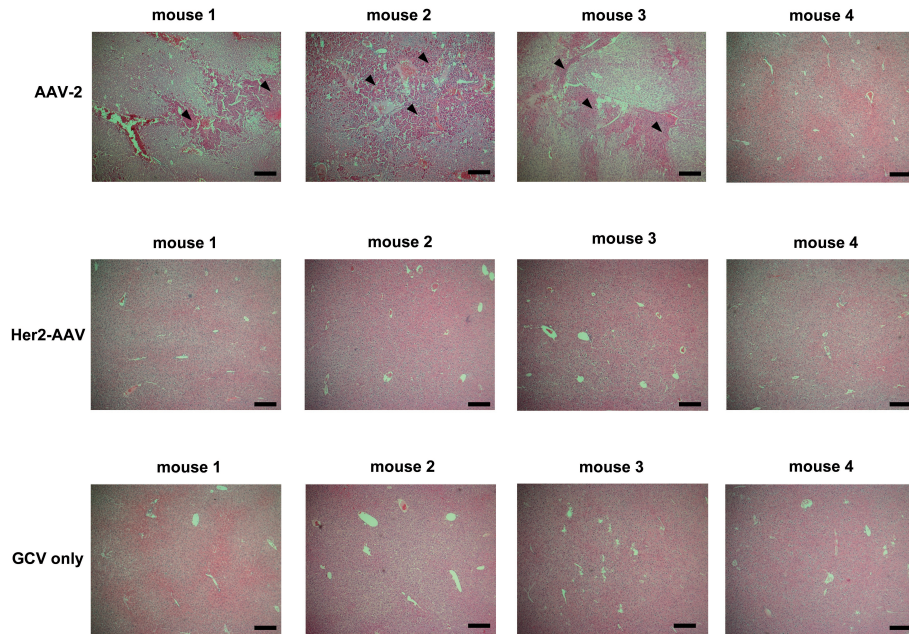

**Figure S8**

Supplement: mt2012186x8.pdf [file mt2012186x8.pdf]
